1  
2 Association between skull bone mineral density and periodontitis:  
3 evidence from the National Health and Nutrition Examination Survey  
4 (2011-2014)

5 Fuqian Jin<sup>1,2</sup>  <sup>¶</sup>Jukun Song<sup>3</sup> & Yi Luo<sup>2</sup> & Beichuan Wang<sup>1,2</sup> & Ming Ding<sup>1,2</sup> & Jiaxin Hu<sup>1,2</sup> <sup>¶</sup>Zhu  
6 Chen<sup>1,2\*</sup> 

7 <sup>1</sup>School of Stomatology, Zunyi Medical University, Zunyi, Guizhou, China

8 <sup>2</sup>Department of Oral Medicine, Guiyang Hospital of Stomatology, Guiyang, Guizhou, China

9 <sup>3</sup>Department of Oral and Maxillofacial Surgery, Guizhou Provincial People's Hospital, Guiyang,  
10 Guizhou, China

11 <sup>¶</sup>These authors contributed equally to this work.

12 & These authors also contributed equally to this work.

13 \* Corresponding author

14 E-mail: [zhuchen@gzu.edu.cn](mailto:zhuchen@gzu.edu.cn) (ZC)

15 Membership list can be found in the Acknowledgments section.

16 **Abstract**

17 Background and Objective: Bone mineral density (BMD) and periodontitis have been the subject of  
18 many studies. However, the relationship between skull (including mandible) BMD and  
19 periodontitis has not been extensively studied. An objective of this cross-sectional study was to  
20 examine the relationship between skull BMD and periodontitis using data from the National Health

21 and Nutrition Examination Surveys (NHANES) for 2011-2012 and 2013-2014.

22 Materials and Methods: From 19,931 participants, 3,802 were screened and included with no  
23 missing values in the study. We examined the distribution of variables by grouping the skull BMD  
24 levels into quartiles. Periodontitis is defined by the Centers for Disease Control and Prevention  
25 (CDC) and the American Periodontal Association (AAP) in 2012. An interaction test was  
26 conducted using stratified and adjusted logistic regression models, and multivariate logistic  
27 regression analysis was performed, along with curve fitting and a threshold effect analysis were  
28 performed on the relationship between skull BMD and periodontitis.

29 Results: The results showed a negatively relationship between skull BMD and the risk of  
30 periodontitis. Although the inflection point was found (the skull BMD= 2.89g/cm<sup>2</sup>), it was not  
31 statistically significant, indicating that the skull BMD and periodontitis are linearly related, which 1  
32 unit increase in the skull BMD (g/cm<sup>2</sup>) was associated with a 30% (OR=0.70; CI=0.57, 0.87;  
33 p=0.0010) reduction in the risk of periodontitis events.

34 Conclusions: Periodontal disease may be related to low skull BMD, for those people, oral hygiene  
35 and health care should be more closely monitored. Validation of our findings will require further  
36 research.

## 37 **Introduction**

38 The burden of periodontitis continues to be a worldwide public health problem, and the majority of  
39 periodontitis incidence is observed in those between 55 and 59 years of age, while younger people  
40 are experiencing an increasing incidence of periodontitis(1). Periodontitis is chronic inflammation  
41 of the tissue supporting teeth, and if it progresses, it can lead to alveolar bone loss and ultimately  
42 tooth loss(2). It is intended that periodontitis occurs when dental plaque accumulates on the teeth  
43 and results in an imbalance between bacterial invasion and host defense(3). Meanwhile, host  
44 responses to general health conditions as well as be associated with periodontitis(4, 5).

45 Osteoporosis and periodontitis have been associated in most cross-sectional studies, especially for  
46 postmenopausal women(6-9).

47 Bone mineral density (BMD) measures are the optimal method for diagnosing osteoporosis and  
48 osteopenia. The World Health Organization recommends using dual energy X-ray absorptiometry  
49 (DXA) to assess the BMD of the spine, hip, and forearm(10). Apparently, osteoporosis has been  
50 associated with periodontal disease risk periodontal diseases(11). Human osteoporosis may  
51 negatively impact alveolar bone height, but periodontitis-induced bone loss is not affected by  
52 skeletal homeostasis (12). A study by Munhoz et al. documented the BMD of mandible was  
53 measured by DXA in systemically healthy subjects and then found that the low BMD of mandible  
54 may be related to chronic periodontitis(13). The mandible has high bone turnover, increased blood  
55 flow, and is more sensitive to osteoclast and osteoblast activity than any other sites, however,  
56 researchers encountered difficulties working with the mandible because of its complex bone  
57 mineral distribution (10). Meanwhile, the skull is connected by irregular shapes and thickness of  
58 the bones, fibrous joints, and complex muscle relationships, which seems to rule out the possibility  
59 of analyzing a single bone(14). The skull (including mandible) BMD, which as part of the whole-  
60 body BMD measurement, is well correlated to the rest of the skeleton(15). Due to very little  
61 mechanical strain and weight bearing on the skull, it is a unique part of the skeleton, at the same  
62 time, the measurement of a skull's BMD may be used to screen for hereditary diseases, skeletal  
63 artifacts, or to assess oral bone loss (15, 16).Athletes with stress sites in their skeleton can increase  
64 bone density through impact loading sports, the study by Courteix et al.(17) reported that in  
65 gymnasts, the skull BMD is lower than other people because of the absence of stress. It is possible  
66 to screen for osteoporosis by measuring BMD with axial skull CT because patients with a positive  
67 head CT scan for the condition are twice as likely to suffer fractures as healthy people are(18).

68 Research on the relationship between skull BMD and periodontitis in a large and representative  
69 population is necessary to develop. Due to this, we analyzed secondary data based on available data  
70 from NHANES. Study objectives are to determine if there is a significant relationship between  
71 skull BMD and periodontitis and to understand the associated confounders.

## Materials and methods

### Data source

In the present cross-sectional retrospective analysis, continuous National Health and Nutrition Examination Survey (NHANES) data from cycles 2011-2012 and 2013-2014 were analyzed. The Centers for Disease Control and Prevention (CDC) manages the National Center for Health Statistics (NCHS) which conducts the NHANES to assess the health and nutritional status of children, adults, and the elderly. Approval of both datasets was granted by NCHS Research Ethics Review Board (ERB), protocol #2011-17 and informed consent was received from all participants. Authors did not collect the data but obtained it from the CDC website which can be downloaded for free (<https://www.cdc.gov/nchs/nhanes/Default.aspx>). This manuscript meets the criteria stated at the STROBE guidelines.

### Study population

There were 19,931 participants in the two cycles of 2011-2012 and 2013-2014, we selected participants who integrally underwent skull BMD assessment (n=10,104), which including 8-59 years old. In total, 4,123 participants provided complete oral examination, which including 30-59 years old. Then those who simultaneous with incomplete clinical and sociodemographic data were removed. In the study, 3802 out of 19,931 participants were screened.

### Variables

The independent variable in the present study was the skull BMD ( $\text{g}/\text{cm}^2$ ), which with Apex 3.2 software, scans were acquired on the Hologic Discovery model A densitometers (Hologic, Inc, Bedford, Massachusetts) and participants aged 8-59 years were eligible. The targeted dependent variable was periodontitis (dichotomous variable). Mobile examination centers (MEC) were used to

97 conduct the periodontal examinations of participants 30 years and older. For the oral health  
98 examination, the NHANES operating manuals described the training and calibration processes.  
99 Clinical attachment loss (AL) was defined as the distance between the cement-enamel junction  
100 (CEJ) and the sulcus base, and the probing depth (PD) was defined as the distance between the free  
101 gingival margin (FGM) and the sulcus base. Based on the 2012 CDC/American Academy of  
102 Periodontology (AAP) periodontitis case definitions, participants must have at least two teeth that  
103 meet specific probing thresholds(19). Specifically, individuals who exhibited at least two  
104 interproximal sites with an attachment loss of at least 3 mm and at least two interproximal sites  
105 with probing depths of at least 4 mm which are not on the same tooth or at least one site with a  
106 probing depth of at least 5 mm, were considered to have at least mild periodontitis. In this study,  
107 mild, moderate and severe periodontitis were uniformly classified as periodontitis group.

108 Covariates include demographic, examination, and questionnaire variables. Demographic  
109 variables include gender, age (30-39, 40-49, and 50-69 years), race, education (more than high  
110 school, high school and less than high school), poverty income ratio, which was divided into (PIR  
111  $<1$ ,  $1 \leq \text{PIR} < 2$ ,  $\text{PIR} \geq 2$ ). Examination variables include comprehensive grip strength (kg), which  
112 was divided into three equal parts (low, middle, and high). Meanwhile, body mass index (BMI)  
113 was classified into three groups ( $<25$ ,  $25-30$ , and  $\geq 30$ ). The questionnaire variables include the last  
114 7 days frequency of floss use ( $<4$  times,  $\geq 4$ times), whether smoking (smoked at least 100  
115 cigarettes in life?). Drinking (Had at least 12 alcohol drinks/1yr?) Depression, using the PHQ-9,  
116 you can determine the frequency of nine depressive symptoms(20). General health condition.  
117 Whether the doctor diagnosed hypertension, diabetes and hypertriglyceridemia. We divided the  
118 sleep time by the optimal sleep time reported in the literature:  $<7$  hours and  $7$  hours(21). A detailed  
119 description of the variables can be found on the NHANES website.

## 121 **Statistical analysis**

122 Variables that are continuous in this study are converted into categorical ones, and categorical

123 variables are expressed by frequency or percentage. Data analysis focused mainly on these three  
124 points this study: (a) which factors modifying or interfering with the relationship between skull  
125 BMD and periodontitis; (b) when the interference factors have been adjusted or after stratifying,  
126 what is the real relationship between skull BMD and periodontitis; and (c) do skull BMD and  
127 periodontitis have a linear or non-linear relationship? As a result, three main steps can be outlined  
128 for data analysis. Firstly, we examined the distribution of variables by grouping the skull BMD  
129 levels into quartiles and then, an interaction test was conducted using stratified. Secondly,  
130 multivariate logistic regression analysis was performed by constructing three statistical models:  
131 model I, no covariates are adjusted; model II, sociodemographic data are adjusted only; model III,  
132 all covariates were adjusted. Finally, a smooth curve fitting (penalized spline method) and a  
133 threshold effect analysis were performed, calculating the inflection point using a recursive  
134 procedure and constructing a two-stage weighted linear regression model on either side of the  
135 inflection point. A recursive algorithm is used to determine the inflection point, then we build a  
136 weighted two-stage linear regression model on both sides of the inflection point. Log likelihood  
137 ratio tests are used to determine whether the model is a linear regression model or two piecewise  
138 linear regression models. In order to make sure that our data analysis was robust, we carried out  
139 sensitivity analyses as follows: According to the quartile level of skull BMD, we divided the  
140 samples into four groups, moreover, we transformed the quartile classification variables into  
141 continuous variables and calculated the trend P. We examined the possibility of nonlinearity by  
142 using skull BMD as a continuous variable. All the analyses were performed with the statistical  
143 software packages R (<http://www.R-project.org>, The R Foundation) and Empower Stats  
144 (<http://www.empowerstats.com>, X&Y Solutions, Inc, Boston, MA). All tests were two-sided and P  
145 values lower than 0.05 were considered statistically significant.

## 146 **Results**

### 147 **Baseline characteristics of participants**

148 An overview of the baseline characteristics of selected participants from the NHANES 2009 to

149 2014 is shown in Table 1. Differences in the distribution of poverty income ratio, hours of sleep,  
 150 Frequency of floss use (last 7 days), alcohol consumption, hypertriglyceridemia, depressive  
 151 symptoms, general health condition in four skull BMD groups (quartiles, Q1-Q4) were not  
 152 statistically significant (all p values > 0.05). In comparison to Q4 group, high skull BMD subjects  
 153 were periodontal health participants, female, 40-49 years old, more than high school education  
 154 level, BMI $\geq$ 30, low combined grip strength, no smoking, no hypertension and diabetes history.

155

156 Table 1. Baseline Characteristics of participants (N=3802)  
 157

| Characteristic                    | The Skull Bone mineral density g/cm <sup>2</sup> |                     |                     |                     | P-value |
|-----------------------------------|--------------------------------------------------|---------------------|---------------------|---------------------|---------|
|                                   | Q1<br>(1.215-1.976)                              | Q2<br>(1.977-2.216) | Q3<br>(2.217-2.478) | Q4<br>(2.479-3.786) |         |
| No. of participants               | 951                                              | 945                 | 955                 | 951                 |         |
| Periodontitis                     |                                                  |                     |                     |                     | <0.001  |
| No                                | 505 (53.10%)                                     | 538 (56.93%)        | 591 (61.88%)        | 608 (63.93%)        |         |
| Yes                               | 446 (46.90%)                                     | 407 (43.07%)        | 364 (38.12%)        | 343 (36.07%)        |         |
| Sex                               |                                                  |                     |                     |                     | <0.001  |
| Male                              | 628 (66.04%)                                     | 555 (58.73%)        | 431 (45.13%)        | 293 (30.81%)        |         |
| Female                            | 323 (33.96%)                                     | 390 (41.27%)        | 524 (54.87%)        | 658 (69.19%)        |         |
| Age                               |                                                  |                     |                     |                     | <0.001  |
| 30-39                             | 327 (34.38%)                                     | 331 (35.03%)        | 351 (36.75%)        | 311 (32.70%)        |         |
| 40-49                             | 263 (27.66%)                                     | 328 (34.71%)        | 347 (36.34%)        | 377 (39.64%)        |         |
| 50-59                             | 361 (37.96%)                                     | 286 (30.26%)        | 257 (26.91%)        | 263 (27.66%)        |         |
| Race                              |                                                  |                     |                     |                     | <0.001  |
| Mexican American                  | 149 (15.67%)                                     | 137 (14.50%)        | 103 (10.79%)        | 115 (12.09%)        |         |
| Other Hispanic                    | 103 (10.83%)                                     | 85 (8.99%)          | 76 (7.96%)          | 83 (8.73%)          |         |
| Non-Hispanic White                | 372 (39.12%)                                     | 408 (43.17%)        | 380 (39.79%)        | 317 (33.33%)        |         |
| Non-Hispanic Black                | 109 (11.46%)                                     | 125 (13.23%)        | 234 (24.50%)        | 330 (34.70%)        |         |
| Other Race Including Multi-Racial | 218 (22.92%)                                     | 190 (20.11%)        | 162 (16.96%)        | 106 (11.15%)        |         |
| Education Level                   |                                                  |                     |                     |                     | 0.025   |
| More than high school             | 555 (58.36%)                                     | 561 (59.37%)        | 600 (62.83%)        | 592 (62.25%)        |         |
| High school                       | 188 (19.77%)                                     | 215 (22.75%)        | 202 (21.15%)        | 195 (20.50%)        |         |

|                                      |                       |              |              |              |              |        |
|--------------------------------------|-----------------------|--------------|--------------|--------------|--------------|--------|
|                                      | Less than high school | 208 (21.87%) | 169 (17.88%) | 153 (16.02%) | 164 (17.25%) |        |
| Poverty income ratio                 |                       |              |              |              |              | 0.392  |
|                                      | PIR < 1               | 190 (19.98%) | 166 (17.57%) | 169 (17.70%) | 185 (19.45%) |        |
|                                      | 1 ≤ PIR < 2           | 200 (21.03%) | 214 (22.65%) | 185 (19.37%) | 202 (21.24%) |        |
|                                      | PIR ≥ 2               | 561 (58.99%) | 565 (59.79%) | 601 (62.93%) | 564 (59.31%) |        |
| Body mass index                      |                       |              |              |              |              | <0.001 |
|                                      | BMI < 25              | 322 (33.86%) | 257 (27.20%) | 262 (27.43%) | 208 (21.87%) |        |
|                                      | 25 ≤ BMI < 30         | 391 (41.11%) | 370 (39.15%) | 307 (32.15%) | 257 (27.02%) |        |
|                                      | BMI ≥ 30              | 238 (25.03%) | 318 (33.65%) | 386 (40.42%) | 486 (51.10%) |        |
| Combined grip strength               |                       |              |              |              |              | <0.001 |
|                                      | Low                   | 274 (28.81%) | 267 (28.25%) | 343 (35.92%) | 376 (39.54%) |        |
|                                      | Middle                | 298 (31.34%) | 314 (33.23%) | 303 (31.73%) | 354 (37.22%) |        |
|                                      | High                  | 379 (39.85%) | 364 (38.52%) | 309 (32.36%) | 221 (23.24%) |        |
| Hours of sleep                       |                       |              |              |              |              | 0.16   |
|                                      | < 7 hour              | 405 (42.59%) | 400 (42.33%) | 385 (40.31%) | 432 (45.43%) |        |
|                                      | ≥ 7 hour              | 546 (57.41%) | 545 (57.67%) | 570 (59.69%) | 519 (54.57%) |        |
| Frequency of floss use (last 7 days) |                       |              |              |              |              | 0.6    |
|                                      | < 4 times             | 564 (59.31%) | 547 (57.88%) | 548 (57.38%) | 535 (56.26%) |        |
|                                      | ≥ 4 times             | 387 (40.69%) | 398 (42.12%) | 407 (42.62%) | 416 (43.74%) |        |
| Smoke consumption                    |                       |              |              |              |              | 0.003  |
|                                      | No                    | 524 (55.10%) | 532 (56.30%) | 555 (58.12%) | 599 (62.99%) |        |
|                                      | Yes                   | 427 (44.90%) | 413 (43.70%) | 400 (41.88%) | 352 (37.01%) |        |
| Alcohol consumption                  |                       |              |              |              |              | 0.062  |
|                                      | No                    | 200 (21.03%) | 202 (21.38%) | 204 (21.36%) | 244 (25.66%) |        |
|                                      | Yes                   | 681 (71.61%) | 691 (73.12%) | 695 (72.77%) | 658 (69.19%) |        |
|                                      | Unknow                | 70 (7.36%)   | 52 (5.50%)   | 56 (5.86%)   | 49 (5.15%)   |        |
| Hypertension history                 |                       |              |              |              |              | 0.002  |
|                                      | No                    | 724 (76.13%) | 692 (73.23%) | 664 (69.53%) | 662 (69.61%) |        |
|                                      | Yes                   | 227 (23.87%) | 253 (26.77%) | 291 (30.47%) | 289 (30.39%) |        |
| Diabetes history                     |                       |              |              |              |              | 0.022  |
|                                      | No                    | 860 (90.43%) | 852 (90.16%) | 863 (90.37%) | 825 (86.75%) |        |
|                                      | Yes                   | 91 (9.57%)   | 93 (9.84%)   | 92 (9.63%)   | 126 (13.25%) |        |
| Hypertriglyceridemia                 |                       |              |              |              |              | 0.057  |
|                                      | No                    | 626 (65.83%) | 649 (68.68%) | 680 (71.20%) | 669 (70.35%) |        |
|                                      | Yes                   | 325 (34.17%) | 296 (31.32%) | 275 (28.80%) | 282 (29.65%) |        |
| Depressive symptoms                  |                       |              |              |              |              | 0.641  |
|                                      | No                    | 818 (86.01%) | 815 (86.24%) | 819 (85.76%) | 822 (86.44%) |        |
|                                      | Yes                   | 66 (6.94%)   | 76 (8.04%)   | 79 (8.27%)   | 79 (8.31%)   |        |



|                          |                          |              |              |              |              |       |
|--------------------------|--------------------------|--------------|--------------|--------------|--------------|-------|
|                          | Unknow                   | 67 (7.05%)   | 54 (5.71%)   | 57 (5.97%)   | 50 (5.26%)   |       |
| General health condition |                          |              |              |              |              | 0.566 |
|                          | Excellent/Very good/Good | 777 (81.70%) | 751 (79.47%) | 765 (80.10%) | 774 (81.39%) |       |
|                          | Fair/Poor                | 174 (18.30%) | 194 (20.53%) | 190 (19.90%) | 177 (18.61%) |       |

Abbreviations: PIR, poverty income ratio. BMI, body mass index.

### Subgroup analyses

In Table 2, the results of a subgroup analysis examining the associations between skull BMD and periodontitis are presented. A negative correlation was found between skull BMD and periodontitis, and alcohol consumption (No: OR = 0.96 95%CI: 0.63-1.46; Yes: OR = 0.66, 95%CI: 0.51-0.86, P for interaction=0.023) was associated with it even more. The effect of the skull BMD on periodontitis showed no difference in the following subgroups: sex, age, race, education levels, poverty income ratio, body mass index, combined grip strength, hours of sleep, Frequency of floss use (last 7 days), smoke consumption, hypertension history, diabetes history, and general health condition (all P for interaction >0.10) (Table 2)

Table 2. Effect of size of the skull bone mineral density on periodontitis in prespecified and exploratory subgroups in Each Subgroup.

| Characteristic   | NO.of participants | OR (95%CI)        | P -value | P for interaction |
|------------------|--------------------|-------------------|----------|-------------------|
| Sex              |                    |                   |          | 0.45              |
| Male             | 1907               | 0.83 (0.60, 1.14) | 0.252    |                   |
| Female           | 1895               | 0.69 (0.52, 0.91) | 0.010    |                   |
| Age              |                    |                   |          | 0.92              |
| 30-39            | 1320               | 0.74 (0.49, 1.13) | 0.162    |                   |
| 40-49            | 1315               | 0.68 (0.47, 0.98) | 0.040    |                   |
| 50-59            | 1167               | 0.72 (0.51, 1.01) | 0.058    |                   |
| Race             |                    |                   |          | 0.74              |
| Mexican American | 504                | 0.54 (0.30, 0.98) | 0.043    |                   |
| Other Hispanic   | 347                | 0.62 (0.32, 1.22) | 0.168    |                   |

|                                      |                                     |      |                   |       |      |
|--------------------------------------|-------------------------------------|------|-------------------|-------|------|
|                                      | Non-Hispanic White                  | 1477 | 0.84 (0.58, 1.23) | 0.378 |      |
|                                      | Non-Hispanic Black                  | 798  | 0.86 (0.57, 1.30) | 0.484 |      |
|                                      | Other Race - Including Multi-Racial | 676  | 0.69 (0.40, 1.19) | 0.186 |      |
| Education Level                      |                                     |      |                   |       | 0.56 |
|                                      | More than high school               | 2308 | 0.81 (0.61, 1.07) | 0.138 |      |
|                                      | High school                         | 800  | 0.71 (0.46, 1.12) | 0.142 |      |
|                                      | Less than high school               | 694  | 0.66 (0.41, 1.06) | 0.088 |      |
| Poverty income ratio                 |                                     |      |                   |       | 0.70 |
|                                      | PIR < 1                             | 710  | 0.80 (0.51, 1.28) | 0.358 |      |
|                                      | 1 ≤ PIR < 2                         | 801  | 0.97 (0.62, 1.51) | 0.886 |      |
|                                      | PIR ≥ 2                             | 2291 | 0.63 (0.47, 0.84) | 0.002 |      |
| Body mass index                      |                                     |      |                   |       | 0.52 |
|                                      | BMI < 25                            | 1049 | 0.75 (0.48, 1.17) | 0.202 |      |
|                                      | 25 ≤ BMI < 30                       | 1325 | 0.64 (0.44, 0.93) | 0.018 |      |
|                                      | BMI ≥ 30                            | 1428 | 0.81 (0.58, 1.12) | 0.196 |      |
| Combined grip strength               |                                     |      |                   |       | 0.11 |
|                                      | Low                                 | 1260 | 0.64 (0.45, 0.92) | 0.014 |      |
|                                      | Middle                              | 1269 | 0.78 (0.54, 1.13) | 0.196 |      |
|                                      | High                                | 1273 | 0.67 (0.45, 1.00) | 0.050 |      |
| Hours of sleep                       |                                     |      |                   |       | 0.31 |
|                                      | < 7 hour                            | 1622 | 0.70 (0.51, 0.96) | 0.025 |      |
|                                      | ≥ 7 hour                            | 2180 | 0.79 (0.59, 1.05) | 0.104 |      |
| Frequency of floss use (last 7 days) |                                     |      |                   |       | 0.32 |
|                                      | < 4 times                           | 2194 | 0.71 (0.54, 0.95) | 0.019 |      |
|                                      | ≥ 4 times                           | 1608 | 0.80 (0.58, 1.11) | 0.181 |      |
| Smoke consumption                    |                                     |      |                   |       | 0.61 |
|                                      | No                                  | 2210 | 0.72 (0.54, 0.97) | 0.028 |      |
|                                      | Yes                                 | 1592 | 0.76 (0.56, 1.05) | 0.095 |      |
| Alcohol consumption                  |                                     |      |                   |       | 0.02 |
|                                      | No                                  | 850  | 0.96 (0.63, 1.46) | 0.846 |      |
|                                      | Yes                                 | 2725 | 0.66 (0.51, 0.86) | 0.002 |      |
|                                      | Unknow                              | 227  | 0.82 (0.31, 2.13) | 0.681 |      |
| Hypertension history                 |                                     |      |                   |       |      |
|                                      | No                                  | 2742 | 0.76 (0.59, 0.98) | 0.036 | 0.80 |
|                                      | Yes                                 | 1060 | 0.67 (0.46, 0.99) | 0.042 |      |
| Diabetes history                     |                                     |      |                   |       | 0.66 |
|                                      | No                                  | 3400 | 0.74 (0.59, 0.92) | 0.008 |      |
|                                      | Yes                                 | 402  | 0.68 (0.37, 1.25) | 0.219 |      |

|                          |                          |      |                   |       |      |
|--------------------------|--------------------------|------|-------------------|-------|------|
| Hypertriglyceridemia     |                          |      |                   |       | 0.07 |
|                          | No                       | 2624 | 0.68 (0.53, 0.88) | 0.003 |      |
|                          | Yes                      | 1178 | 0.88 (0.60, 1.28) | 0.490 |      |
| General health condition |                          |      |                   |       | 0.95 |
|                          | Excellent/Very good/Good | 3067 | 0.73 (0.57, 0.92) | 0.009 |      |
|                          | Fair/Poor                | 735  | 0.86 (0.54, 1.37) | 0.519 |      |
|                          |                          |      |                   |       |      |

Abbreviations: PIR, poverty income ratio. BMI, body mass index. CI, confidence interval. OR, odds ratio. Adjusted for sex, age, race, education level, PIR, BMI, combined grip strength, hours of sleep, Frequency of floss use (last 7 days), smoke consumption, alcohol consumption, hypertension history, diabetes history, hypertriglyceridemia, general health condition except the subgroup variable.

### Relationship between skull BMD and periodontitis.

The correlation between skull BMD and periodontitis levels is shown in Table 3. When all covariables were considered, the full-adjusted mode indicated that with each additional unit of skull BMD, periodontitis risk decreased by 30% (OR=0.70; CI=0.57, 0.87; p=0.0010), with P for trend lower than 0.05. The skull BMD was stratified by quartile in sensitivity analysis and estimated P for trend to ensure robustness of results. Compared to the reference Q1 group, the estimated increase in skull BMD was 0.91, 0.78, 0.67 respectively for the Q2, Q3, and Q4 groups. The P for trend of 0.0002, the results of skull BMD as a continuous variable were also consistent.

Table 3. Relationship between skull bone mineral density and periodontitis.

| Exposure                         | Non-adjusted model (OR, 95%CI, P) | Minimally adjusted model (OR, 95%CI, P) | Fully-adjusted mode (OR, 95%CI, P) |
|----------------------------------|-----------------------------------|-----------------------------------------|------------------------------------|
| The skull BMD, g/cm <sup>2</sup> | 0.64 (0.54, 0.76) <0.0001         | 0.72 (0.59, 0.89) 0.0017                | 0.70 (0.57, 0.87) 0.0010           |
| The skull BMD (quartile)         |                                   |                                         |                                    |
| Q1                               | Ref                               | Ref                                     | Ref                                |
| Q2                               | 0.85 (0.71, 1.02) 0.0803          | 0.92 (0.75, 1.12) 0.3914                | 0.91 (0.74, 1.12) 0.3753           |
| Q3                               | 0.70 (0.58, 0.83) <0.0001         | 0.79 (0.65, 0.97) 0.0234                | 0.78 (0.63, 0.96) 0.0188           |
| Q4                               | 0.64 (0.53, 0.76) <0.0001         | 0.69 (0.56, 0.86) 0.0007                | 0.67 (0.54, 0.83) 0.0004           |
| P for trend                      | <0.0001                           | 0.0003                                  | 0.0002                             |

Abbreviations: BMD, bone mineral density. CI, confidence interval. OR, odds ratio. Non-adjusted model adjust for: None.

192 Minimally-adjusted model adjust for: Sex; Age; Race; Education Level; PIR.  
193 Adjust II model adjust for: Sex; Age; Race; Education Level; Poverty income ratio; BMI; Combined grip strength; Frequency of floss use  
194 (last 7 days); Hours of sleep; Smoke consumption; Alcohol consumption; Diabetes history; Hypertension history; Hypertriglyceridemia;  
195 Depressive symptoms.  
196

### 197 198 **Identification of linear relationship**

199 The smooth curve fitting is shown in Fig 1 (Association between skull bone mineral density and  
200 periodontitis). We identified a linear correlation between skull BMD and periodontitis using the  
201 generalized additive model (Table 4). We compared linear regression and two-piecewise linear  
202 regression, the point of inflection was 2.89g/cm<sup>2</sup>. For the left and right inflection points, the odds  
203 ratio and confidence intervals are 0.65 (0.50-0.82) and 1.76 (0.49-6.30), respectively. However, the  
204 P value for the log-likelihood ratio test is 0.150 (>0.05), indicating that the linear regression model  
205 should be used to fit the data.  
206

207 Table 4. Threshold Effect Analysis of the skull bone mineral density and periodontitis using Piece-wise Linear Regression.  
208

| Outcome                                                  | Periodontitis (OR, 95%CI, P) |
|----------------------------------------------------------|------------------------------|
| Fitting by weighted linear regression model              | 0.70 (0.57, 0.87) 0.0010     |
| Fitting by weighted two-piecewise linear regression mode |                              |
| Inflection point                                         | 2.89                         |
| < 2.89                                                   | 0.65 (0.52, 0.82) 0.0003     |
| ≥ 2.89                                                   | 1.76 (0.49, 6.30) 0.3827     |
| Log likelihood ratio test                                | 0.152                        |

209 Abbreviations: CI, confidence interval. OR, odds ratio.  
210 Adjusted for Sex; Age; Race; Education Level; Poverty income ratio; BMI; Combined grip strength; Frequency of floss use (last 7 days);  
211 Hours of sleep; Smoke consumption; Alcohol consumption; Diabetes history; Hypertension history; Hypertriglyceridemia; Depressive  
212 symptoms.  
213  
214

## Discussion

In the present investigation, we revealed that sex, age, race, poverty income ratio, body mass index, hours of sleep, Frequency of floss use (last 7 days), smoke consumption, alcohol consumption, hypertension history, diabetes history, hypertriglyceridemia, general health condition interfere with the relationship between skull BMD and periodontitis. Interestingly, we found that alcohol consumption playing an important role in skull BMD and periodontitis. Drinking is well-known to be an important risk factor for periodontitis(22-24). On the other hand, low-to-moderate alcohol intake has been associated with slowing age-related bone loss by reducing the overall rate of bone remodeling(25). After adjusting for various potential factors, participants with higher skull BMD displayed significantly lower risk of periodontitis, which 1 unit increase in the skull BMD ( $\text{g}/\text{cm}^2$ ) was associated with a 30% (OR=0.70; CI=0.57, 0.87 p=0.0010) reduction in the risk of periodontitis events. The relationship between skull BMD and periodontitis was linear. Although the inflection point was found (the skull BMD=  $2.89\text{g}/\text{cm}^2$ ), it was not statistically significant. This is, to our knowledge, the first study to utilize a national survey (NHANES) to analyze the association between skull BMD and periodontitis.

Preclinical studies in ovariectomized animals may explain the link between the low skull BMD and periodontitis. Chen et al.(26) performed ovariectomized mice model, which reliably produced osteopenic or osteoporotic phenotype in long bones, successfully constructed the jaw osteoporotic phenotype, 8 weeks later, it was found that the alveolar bone of osteoporotic mice was significantly thinner, along with periodontal ligament(PDL) width and cell density in the PDL were significantly reduced 18% and 25%, respectively, and A reduced number of osteoprogenitor cells, which persisted even after injury, impacted the rate of alveolar bone regeneration. Likewise, Arioka et al.(27) found the same result. Osteoporotic changes in the periodontium seems to create a vicious circle, leading to more severe periodontitis.

Postmenopausal women with osteoporosis are more susceptible to periodontal disease(6-9), which

241 the consequence of estrogen and BMD could be inferred(8). Hunziker et al.(28) suggest that  
242 declining estrogen secretion can result in a decrease in mandibular BMD in periodontitis patients.  
243 The average age of menopause varies by race and lifestyle, but it is around 50 years in most  
244 countries(29). In our study, however, it was not found that the prevalence of periodontitis was  
245 higher in females over 50 years old than it was in males. In line with the literature(16), we observed  
246 higher skull BMD in woman than in either of the groups of man. The study of Obrant et al.(16)  
247 found that women aged 18 to 87 years had significantly higher skull BMD than men of the same  
248 age. Wells et al.(30) indicated that women and men have the same bone mineral content in their  
249 trunks and limbs before they turn 16, however, from about this age, bone mineral content in all  
250 body regions was significantly different between males and females, especially in men, therefore,  
251 adult men's skull bone mass is a small portion of their total bone mass. Paschall et al.(31)  
252 investigated the suitability of measuring the skull BMD for estimating age in older adults using  
253 DXA and found that a steady increase in the skull BMD in women occurs until they reach 55 years  
254 old, at which point an abrupt decline has occurred, in contrast, BMD values in males decrease  
255 slightly around 75 years old, but remain steady throughout life. The reason for this difference is the  
256 skull BMD did not change synchronously with the rest of the skeleton. Meanwhile, because skull  
257 BMD makes up most of the whole body's BMD, when it is excluded from the whole-body BMD,  
258 fracture risk can be better predicted (32, 33).

259 Furthermore, the mandibular inferior cortex such as mental index (MI) is a part of the panoramic  
260 radiograph that can be used to detect osteoporosis in asymptomatic individuals(34, 35). The results  
261 of studies indicate that postmenopausal female dental patients who have MI less than 3 mm on  
262 panoramic radiographs, osteoporosis or lower skeletal BMD may be a risk(36, 37). Notably, instead  
263 of being diagnostic criteria, these clinical indexes tend to warn about osteoporosis. Additionally, it  
264 was not found that these index values correlated with either the maxillary or mandibular BMD(38),  
265 nor with periodontitis(39).

266 According to our investigation, data from a large population is used to assess the association

267 between skull BMD and periodontitis for the first time. Moreover, our study included craniofacial  
268 bones, used the most ideal method (dual-energy X-ray absorptiometry) to detect BMD. However,  
269 despite those advantages, there were a few limitations. Firstly, NHANES data do not include all  
270 confounding factors. For example, people with high BMD are not distinguished, because the  
271 increase of BMD may also be secondary to a series of potential diseases affecting bone, Secondly,  
272 this study can't be compared with other studies because rarely studied on the skull BMD and  
273 periodontitis, the scope of discussion is limited. Therefore, the study could not reflect the most real  
274 relationship between skull BMD and periodontitis, and more information should be studied and  
275 public health data used.

## 276 **Conclusion**

277 Periodontal disease may be related to low skull BMD, for those people, oral hygiene and health care  
278 should be more closely monitored.

## 280 **Supporting information**

281 **Supplement table 1.** Univariate analysis for periodontitis.

## 282 **Acknowledgments**

283 We would like to thank the NHANES databases for making this data available.

## 284 **Author Contributions**

285 **Conceptualization:** Fuqian Jin, Jukun Song, Yi Luo

286 **Formal analysis:** Beichuan Wang, Ming Ding, Jiaxin Hu

287 **Funding acquisition:** Yi Luo

288  
289  
290  
291  
292  
293  
294  
295  
296  
297  
298  
299  
300  
301  
302  
303  
304  
305

**Investigation:** Fuqian Jin, Jukun Song, Zhu Chen

**Methodology:** Fuqian Jin, Jiixin Hu

**Supervision:** Jukun Song, Zhu Chen, Yi Luo

**Writing - original draft:** Fuqian Jin, Beichuan Wang, Ming Ding, Jiixin Hu

**Writing - review & editing:** Fuqian Jin, Jukun Song, Yi Luo, Beichuan Wang, Ming Ding, Jiixin Hu, Zhu Chen

## **Data availability statement**

The NHANES database is available for download (<https://wwwn.cdc.gov/nchs/nhanes/Default.aspx>)

## **Funding statement**

A grant from the Science and Technology Plan Project of Guiyang in 2014([2014]003) and 2019 ([2019]9-7-13).

## **Conflict of interest disclosure**

All authors declare that they have no conflicts of interest to report.

## **Ethics approval statement**

Approval of both datasets was granted by NCHS Research Ethics Review Board (ERB), protocol #2011-17 and informed consent was received from all participants.



306

## ORCID

307

Fuqian Jin  <https://orcid.org/0000-0002-3911-2363>

308

Zhu Chen  <https://orcid.org/0000-0002-6167-4389>

309

## References

310

311

312

313

314

315

316

317

318

319

320

321

322

323

324

325

326

327

328

329

330

331

332

333

334

335

336

337

338

339

340

341

342

343

344

345

346

347

348

349

350

1. Wu L, Zhang SQ, Zhao L, Ren ZH, Hu CY. Global, regional, and national burden of periodontitis from 1990 to 2019: results from the Global Burden of Disease study 2019. *Journal of periodontology*. 2022.
2. Pihlstrom BL, Michalowicz BS, Johnson NW. Periodontal diseases. *Lancet (London, England)*. 2005;366(9499):1809-20.
3. Passos JS, Vianna MI, Gomes-Filho IS, Cruz SS, Barreto ML, Adan L, et al. Osteoporosis/osteopenia as an independent factor associated with periodontitis in postmenopausal women: a case-control study. *Osteoporosis international : a journal established as result of cooperation between the European Foundation for Osteoporosis and the National Osteoporosis Foundation of the USA*. 2013;24(4):1275-83.
4. Cardoso EM, Reis C, Manzanares-Céspedes MC. Chronic periodontitis, inflammatory cytokines, and interrelationship with other chronic diseases. *Postgraduate medicine*. 2018;130(1):98-104.
5. Oztürk Tonguç M, Büyükkaplan US, Fentoglu O, Gümüş BA, Çerçi SS, Kirzioglu FY. Comparison of bone mineral density in the jaws of patients with and without chronic periodontitis. *Dento maxillo facial radiology*. 2012;41(6):509-14.
6. Lee Y. Association between osteoporosis and periodontal disease among menopausal women: The 2013-2015 Korea National Health and Nutrition Examination Survey. *PloS one*. 2022;17(3):e0265631.
7. Hong SJ, Yang BE, Yoo DM, Kim SJ, Choi HG, Byun SH. Analysis of the relationship between periodontitis and osteoporosis/fractures: a cross-sectional study. *BMC oral health*. 2021;21(1):125.
8. Kim CS, Kim EK, Lee KS, Lee HK, Choi YH, Hwang TY, et al. Relationship between bone mineral density, its associated physiological factors, and tooth loss in postmenopausal Korean women. *BMC women's health*. 2015;15:65.
9. Kim JW, Kong KA, Kim HY, Lee HS, Kim SJ, Lee SH, et al. The association between bone mineral density and periodontitis in Korean adults (KNHANES 2008-2010). *Oral Dis*. 2014;20(6):609-15.
10. Sun Y, An MM, Wang J, Yang F, He L, Dudzek CA, et al. Assessment of the Bone Mineral Content in the Mandible by Dual-Energy X-Ray Absorptiometry to Evaluate Short-Term Change. *Journal of clinical densitometry : the official journal of the International Society for Clinical Densitometry*. 2018;21(4):534-40.
11. Suzuki F, Okamoto S, Miyagi S, Tsujiguchi H, Hara A, Nguyen TTT, et al. Relationship between Decreased Mineral Intake Due to Oral Frailty and Bone Mineral Density: Findings from Shika Study. *Nutrients*. 2021;13(4).
12. Barr C, Sharafieh R, Schwarz G, Wu R, Klueh U, Kreutzer D. Noninflammatory Stress-Induced Remodeling of Mandibular Bone: Impact of Age and Pregnancy. *Journal of oral and maxillofacial surgery : official journal of the American Association of Oral and Maxillofacial Surgeons*. 2021;79(5):1147-55.
13. Munhoz L, Morita L, Nagai AY, Moreira J, Arita ES. Mandibular cortical index in the screening of postmenopausal at low mineral density risk: a systematic review. *Dento maxillo facial radiology*. 2021;50(4):20200514.
14. Herring S, Ochareon P. Bone—special problems of the craniofacial region. *Orthodontics & craniofacial research*. 2005;8(3):174-82.
15. Turner AS, Maillet JM, Mallinckrodt C, Cordain L. Bone mineral density of the skull in premenopausal women. *Calcified tissue international*. 1997;61(2):110-3.
16. Obrant K. Bone mineral density in the head is higher in women than in men. *Bone*. 1995;16:S153.
17. Courteix D, Lespessailles E, Obert P, Benhamou CL. Skull bone mass deficit in prepubertal highly-trained gymnast girls. *International journal of sports medicine*. 1999;20(5):328-33.
18. Taylor A, Waxman K, Izfar S, Grotts J, Yim S. Screening for osteoporosis after trauma: a new approach using quantitative computed tomography of the skull. *The journal of trauma and acute care surgery*. 2014;77(4):635-9.
19. Eke PI, Page RC, Wei L, Thornton-Evans G, Genco RJ. Update of the case definitions for population-based surveillance of periodontitis. *Journal of periodontology*. 2012;83(12):1449-54.
20. Beydoun HA, Hossain S, Beydoun MA, Weiss J, Zonderman AB, Eid SM. Periodontal disease, sleep duration, and white blood cell markers in the 2009 to 2014 National Health and Nutrition Examination Surveys. *Journal of periodontology*. 2020;91(5):582-95.

- 351 21. Wiener RC. Relationship of Routine Inadequate Sleep Duration and Periodontitis in a Nationally Representative Sample. *Sleep*  
352 *disorders*. 2016;2016:9158195.
- 353 22. Baumeister SE, Freuer D, Nolde M, Kocher T, Baurecht H, Khazaei Y, et al. Testing the association between tobacco smoking,  
354 alcohol consumption, and risk of periodontitis: A Mendelian randomization study. *Journal of clinical periodontology*. 2021;48(11):1414-20.
- 355 23. Gay IC, Tran DT, Paquette DW. Alcohol intake and periodontitis in adults aged  $\geq 30$  years: NHANES 2009-2012. *Journal of*  
356 *periodontology*. 2018;89(6):625-34.
- 357 24. Han SJ, Yi YJ, Bae KH. The association between periodontitis and dyslipidemia according to smoking and harmful alcohol use in a  
358 representative sample of Korean adults. *Clinical oral investigations*. 2020;24(2):937-44.
- 359 25. Gaddini GW, Turner RT, Grant KA, Iwaniec UT. Alcohol: a simple nutrient with complex actions on bone in the adult skeleton.  
360 *Alcoholism: clinical and experimental research*. 2016;40(4):657-71.
- 361 26. Chen CH, Wang L, Serdar Tulu U, Arioka M, Moghim MM, Salmon B, et al. An osteopenic/osteoporotic phenotype delays alveolar  
362 bone repair. *Bone*. 2018;112:212-9.
- 363 27. Arioka M, Zhang X, Li Z, Tulu US, Liu Y, Wang L, et al. Osteoporotic Changes in the Periodontium Impair Alveolar Bone Healing.  
364 *Journal of dental research*. 2019;98(4):450-8.
- 365 28. Hunziker J, Wronski TJ, Miller SC. Mandibular bone formation rates in aged ovariectomized rats treated with anti-resorptive agents  
366 alone and in combination with intermittent parathyroid hormone. *Journal of dental research*. 2000;79(6):1431-8.
- 367 29. Shi J, Zhang B, Choi JY, Gao YT, Li H, Lu W, et al. Age at menarche and age at natural menopause in East Asian women: a genome-  
368 wide association study. *Age (Dordrecht, Netherlands)*. 2016;38(5-6):513-23.
- 369 30. Wells JC. Sexual dimorphism of body composition. *Best practice & research Clinical endocrinology & metabolism*. 2007;21(3):415-  
370 30.
- 371 31. Paschall A, Ross AH. Biological sex variation in bone mineral density in the cranium and femur. *Science & justice : journal of the*  
372 *Forensic Science Society*. 2018;58(4):287-91.
- 373 32. Taylor A, Konrad PT, Norman ME, Harcke HT. Total body bone mineral density in young children: influence of head bone mineral  
374 density. *Journal of Bone and Mineral Research*. 1997;12(4):652-5.
- 375 33. Ringertz J. Effect of bone density of the head on total body DEXA measurements in 100 healthy Swedish women. *Acta radiologica*  
376 *(Stockholm, Sweden : 1987)*. 1996;37(1):101-6.
- 377 34. Munhoz L, Takahashi DY, Nishimura DA, Ramos E, Tenorio JDR, Arita ES. Do Patients with Osteoporosis Have Higher Risk to  
378 Present Reduced Alveolar Ridge Height? An Imaging Analysis. *Indian journal of dental research : official publication of Indian Society for*  
379 *Dental Research*. 2019;30(5):747-50.
- 380 35. Ren J, Fan H, Yang J, Ling H. Detection of Trabecular Landmarks for Osteoporosis Prescreening in Dental Panoramic Radiographs.  
381 *Annual International Conference of the IEEE Engineering in Medicine and Biology Society IEEE Engineering in Medicine and Biology*  
382 *Society Annual International Conference*. 2020;2020:2194-7.
- 383 36. Taguchi A, Tanaka R, Kakimoto N, Morimoto Y, Arai Y, Hayashi T, et al. Clinical guidelines for the application of panoramic  
384 radiographs in screening for osteoporosis. *Oral Radiol*. 2021;37(2):189-208.
- 385 37. Jonasson G, Hassani-Nejad A, Hakeberg M. Mandibular cortical bone structure as risk indicator in fractured and non-fractured 80-  
386 year-old men and women. *BMC oral health*. 2021;21(1):468.
- 387 38. Gulsahi A, Paksoy CS, Ozden S, Kucuk NO, Cebeci AR, Genc Y. Assessment of bone mineral density in the jaws and its relationship  
388 to radiomorphometric indices. *Dento maxillo facial radiology*. 2010;39(5):284-9.
- 389 39. Mudda JA, Bajaj M, Patil VA. A Radiographic comparison of mandibular bone quality in pre- and post-menopausal women in Indian  
390 population. *Journal of Indian Society of Periodontology*. 2010;14(2):121-5.
- 391

medRxiv preprint doi: <https://doi.org/10.1101/2022.07.04.22277233>; this version posted July 6, 2022. The copyright holder for this preprint (which was not certified by peer review) is the author/funder, who has granted medRxiv a license to display the preprint in perpetuity. It is made available under a [CC-BY 4.0 International license](https://creativecommons.org/licenses/by/4.0/).

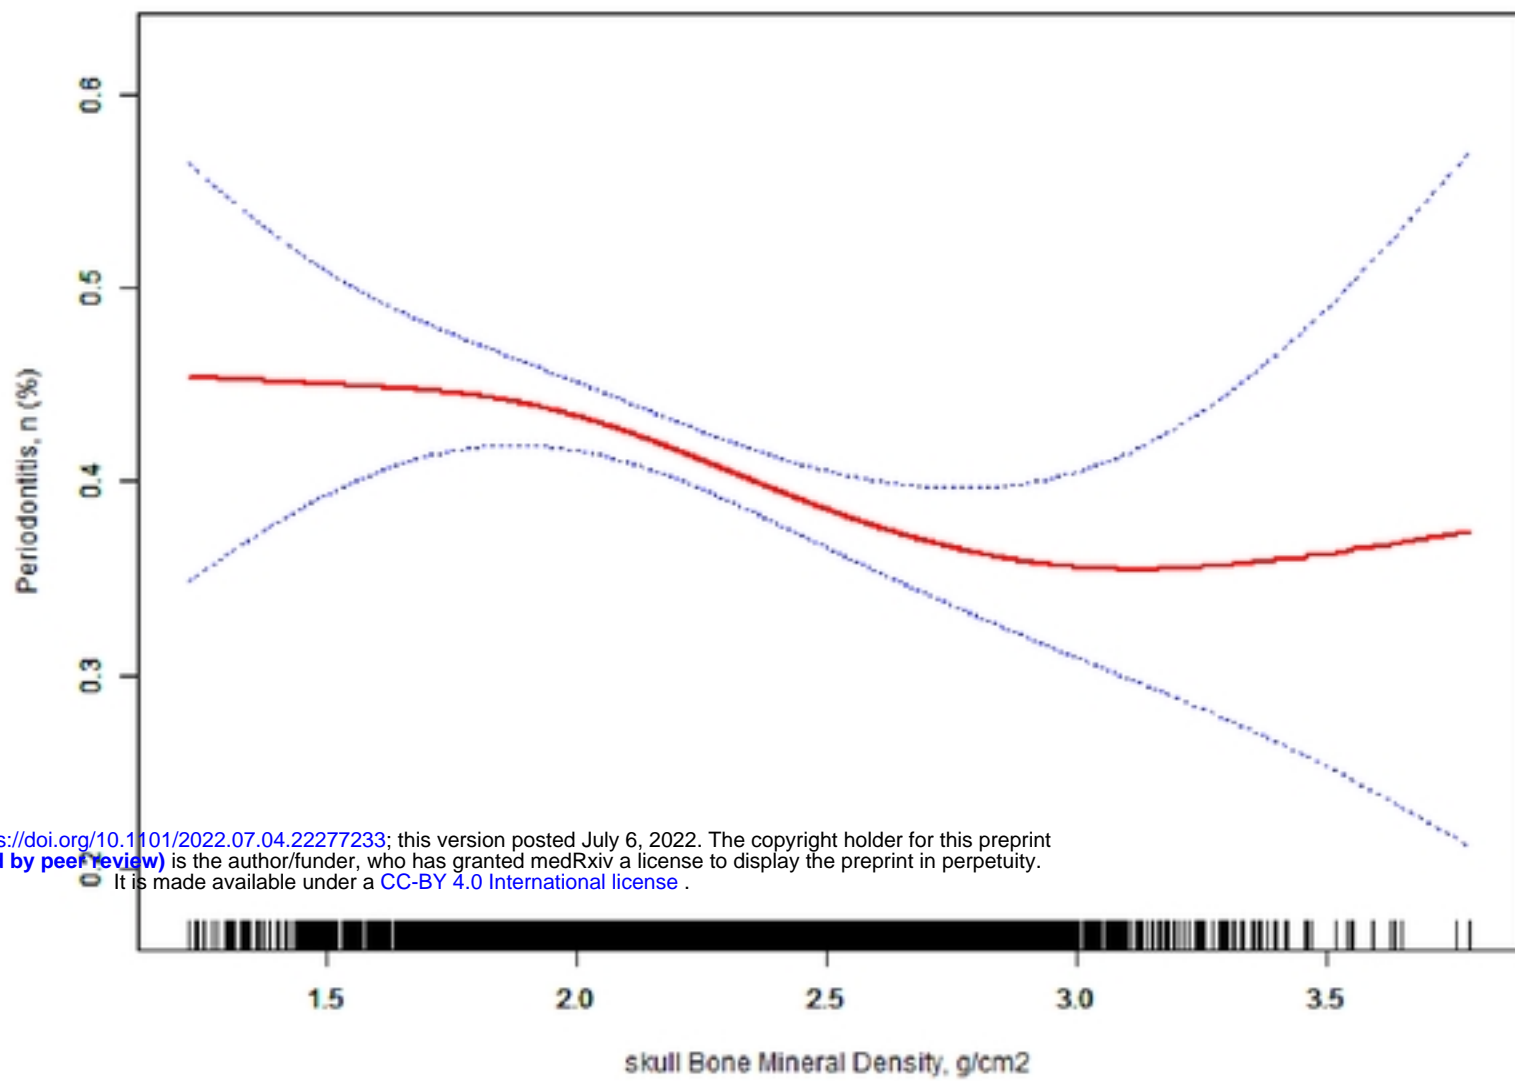

Fig 1. Association between skull bone mineral density and periodontitis.

Solid red line represents the smooth curve fit between variables. Blue bands represent the 95% of confidence interval from the fit. All adjusted for Sex; Age; Race; Education Level; Poverty income ratio; BMI; Combined grip strength; Frequency of floss use (last 7 days), Hours of sleep; Smoke consumption; Alcohol consumption; Diabetes history; Hypertension history; Hypertriglyceridemia; Depressive symptoms.
